# Supplementary material for: Tailoring mixed ionic–electronic conduction in H2 permeable membranes based on the system Nd5.5W1−xMoxO11.25−δ
Source: Royal Society of Chemistry journal article supplement (doi:10.1039/c4ta03699a), 2014-11-03
Supplement: c4ta03699a1.pdf [file c4ta03699a1.pdf]

## Supporting information

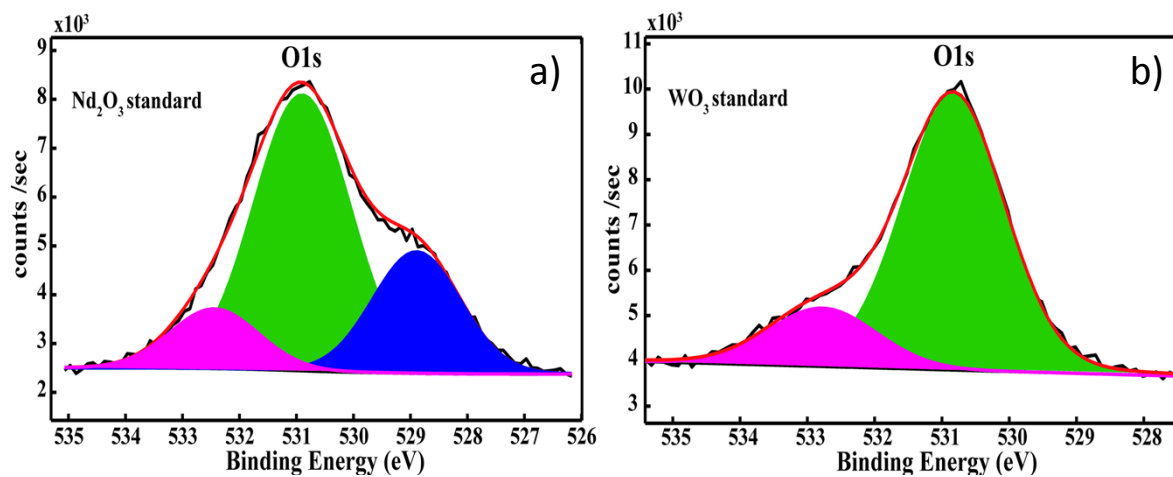

Figure S1: High resolution spectra for O1s line using  $\text{Nd}_2\text{O}_3$  (a) and  $\text{WO}_3$  (b) high purity commercial powders.
